# Supplementary material for: Engineering Ag43 Signal Peptides with Bacterial Display and Selection
Source: MDPI journal article supplement (doi:10.3390/mps6010001), 2022-12-23
Supplement: s1 [file s1]

## Supplementary Materials

**Table S1.** Primers and their corresponding PCR profiles.

| Ag43LinkBlac_F and Ag43LinkBlac_R    |                                                                                                          |             |
|--------------------------------------|----------------------------------------------------------------------------------------------------------|-------------|
| Component                            | Sequence                                                                                                 |             |
| Ag43LinkBlac_F                       | 5'- CAG ATC CTC GCT TGC AGC AGC CCA ATG CTT AAT CAG TGA<br>GGC ACC -3'                                   |             |
| Ag43LinkBlac_R                       | 5'- TGG TAT GGA CGA ATT ATA TAA AGG TAC CGG CGG AGG CTC<br>CCA CCC AGA AAC GCT GGT GAA AGT AAA AGA T -3' |             |
| Ag43BlacGib_F and Ag43BlacGib_R      |                                                                                                          |             |
| Component                            | Sequence                                                                                                 |             |
| Ag43BlacGib_F                        | 5'- CAG ATC CTC GCT TGC AGC AGC CCA ATG CTT AAT CAG TGA<br>GGC ACC -3'                                   |             |
| Ag43BlacGib_R                        | 5'- TGG TAT GGA CGA ATT ATA TAA AGG TAC CGG CGG AGG CTC<br>CCA CCC AGA AAC GCT GGT GAA AGT AAA AGA T -3' |             |
| PCR Profiles                         |                                                                                                          |             |
| Step                                 | Temperature                                                                                              | Time        |
| Initial Denaturation                 |                                                                                                          | 120 seconds |
|                                      | Stage 1(Touchdown PCR, 15 cycles)                                                                        |             |
| Denaturation                         | 95°C                                                                                                     | 30 seconds  |
| Annealing                            | 72°C (-1°C each cycle)                                                                                   | 30 seconds  |
| Extension (850 bp Product)           | 72°C                                                                                                     | 25 seconds  |
|                                      | Stage 2(Conventional PCR, 25 cycles)                                                                     |             |
| Denaturation                         | 95°C                                                                                                     | 30 seconds  |
| Annealing                            | 60°C (-1°C each cycle)                                                                                   | 30 seconds  |
| Extension (850 bp Product)           | 72°C                                                                                                     | 25 seconds  |
| Ag43BBGib_F and Ag43BBGib_R          |                                                                                                          |             |
| Component                            | Sequence                                                                                                 | Amount      |
| Ag43BBGib_F                          | 5'- GGT ACC TTT ATA TAA TTC GTC CAT ACC ATG CGT -3'                                                      |             |
| Ag43BBGib_R                          | 5'- GCT GCT GCA AGC GAG GAT CTG TAC TTT CAG AGC GG -3'                                                   |             |
| PCR Profiles                         |                                                                                                          |             |
| Step                                 | Temperature                                                                                              | Time        |
| Initial Denaturation                 |                                                                                                          | 120 seconds |
|                                      | Stage 1(Touchdown PCR, 15 cycles)                                                                        |             |
| Denaturation                         | 95°C                                                                                                     | 30 seconds  |
| Annealing                            | 72°C (-1°C each cycle)                                                                                   | 30 seconds  |
| Extension (5574 bp Product)          | 72°C                                                                                                     | 180 seconds |
|                                      | Stage 2(Conventional PCR, 25 cycles)                                                                     |             |
| Denaturation                         | 95°C                                                                                                     | 30 seconds  |
| Annealing                            | 60°C (-1°C each cycle)                                                                                   | 30 seconds  |
| Extension (5574 bp Product)          | 72°C                                                                                                     | 180 seconds |
| Ag43SpSeq_F and Ag43SpSeq_R          |                                                                                                          |             |
| Component                            | Sequence                                                                                                 | Amount      |
| Ag43SpSeq_F                          | 5'- ATC GAT GTC TCG ATC ACG TCG CGG GAA TTG TGA GCG GAT<br>AAC AAT -3';                                  |             |
| Ag43SpSeq_R                          | 5'- GCA CCA GAC GGT TGC CAC AGG CAT CTT TGC TCA GCA CGC<br>TTT GGG -3'                                   |             |
| PCR Profiles                         |                                                                                                          |             |
| Step                                 | Temperature                                                                                              | Time        |
| Initial Denaturation                 |                                                                                                          | 120 seconds |
| Stage 1(Touchdown PCR, 15 cycles)    |                                                                                                          |             |
| Denaturation                         | 95°C                                                                                                     | 30 seconds  |
| Annealing                            | 72°C (-1°C each cycle)                                                                                   | 30 seconds  |
| Extension (1011 bp Product)          | 72°C                                                                                                     | 45 seconds  |
| Stage 2(Conventional PCR, 20 cycles) |                                                                                                          |             |
| Denaturation                         | 95°C                                                                                                     | 30 seconds  |
| Annealing                            | 60°C                                                                                                     | 30 seconds  |

---

Extension(1011 bp Product)

72°C

45 seconds

---

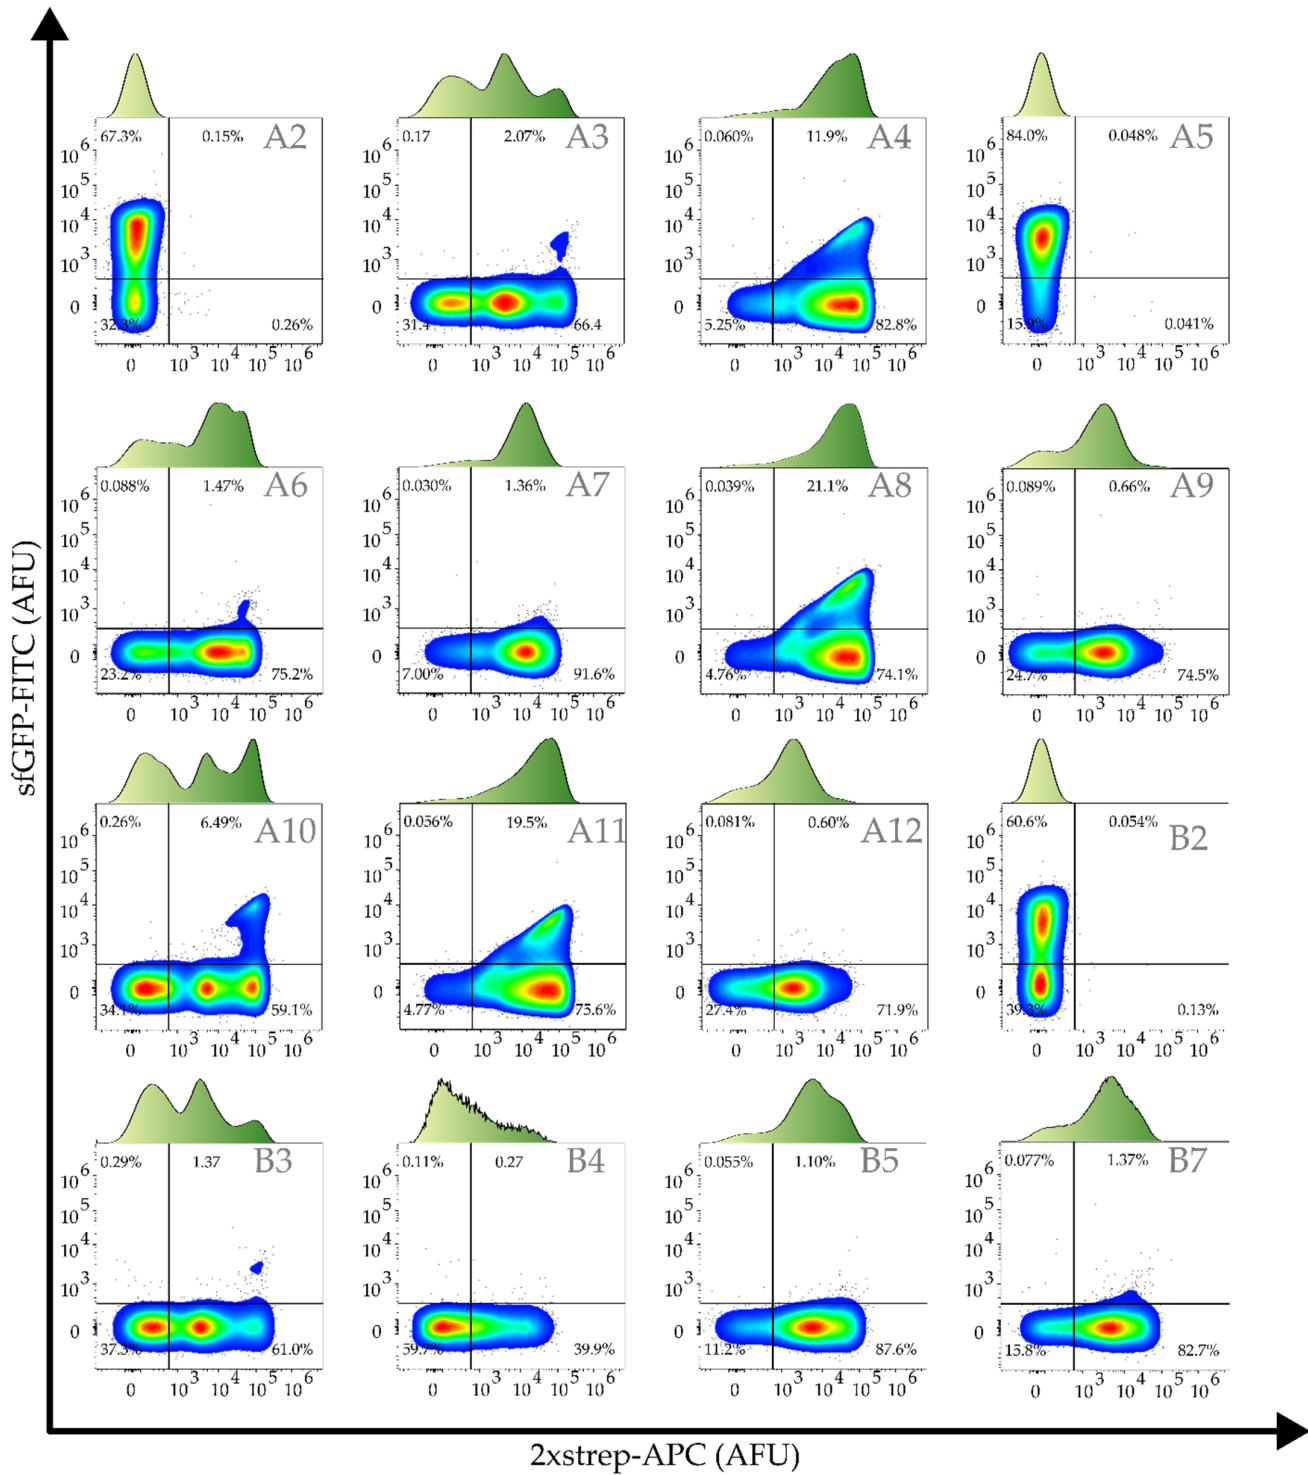

**Figure S1.** Representative flow cytometric analysis of screened clones (labelled as A2-D12).

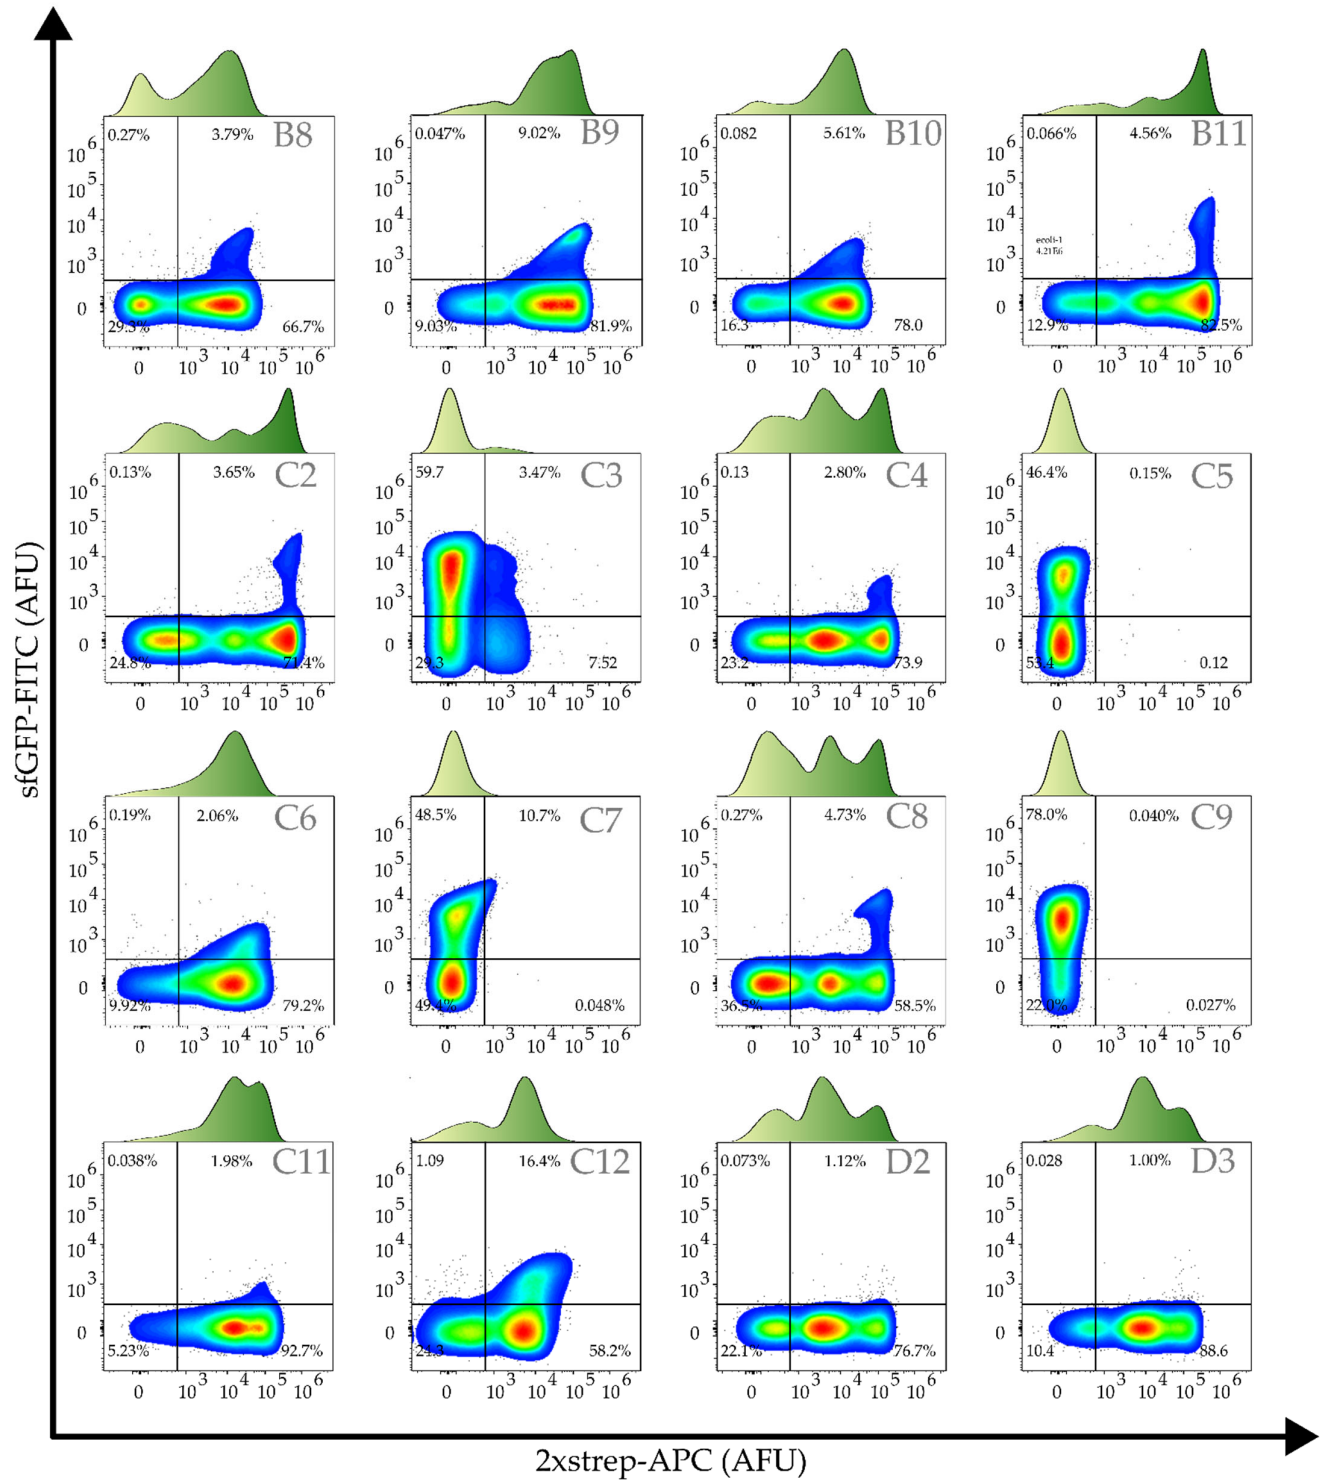

**Figure S2.** Representative flow cytometric analysis of screened clones (labelled as A2-D12).

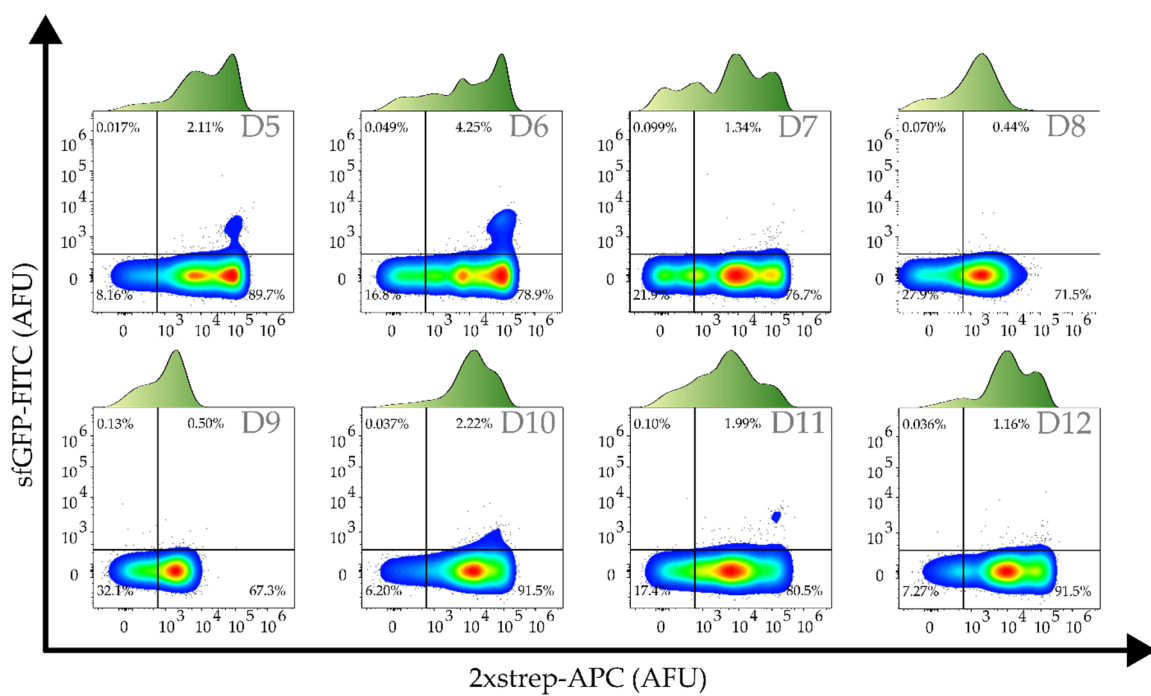

**Figure S3.** Representative flow cytometric analysis of screened clones (labelled as A2-D12).



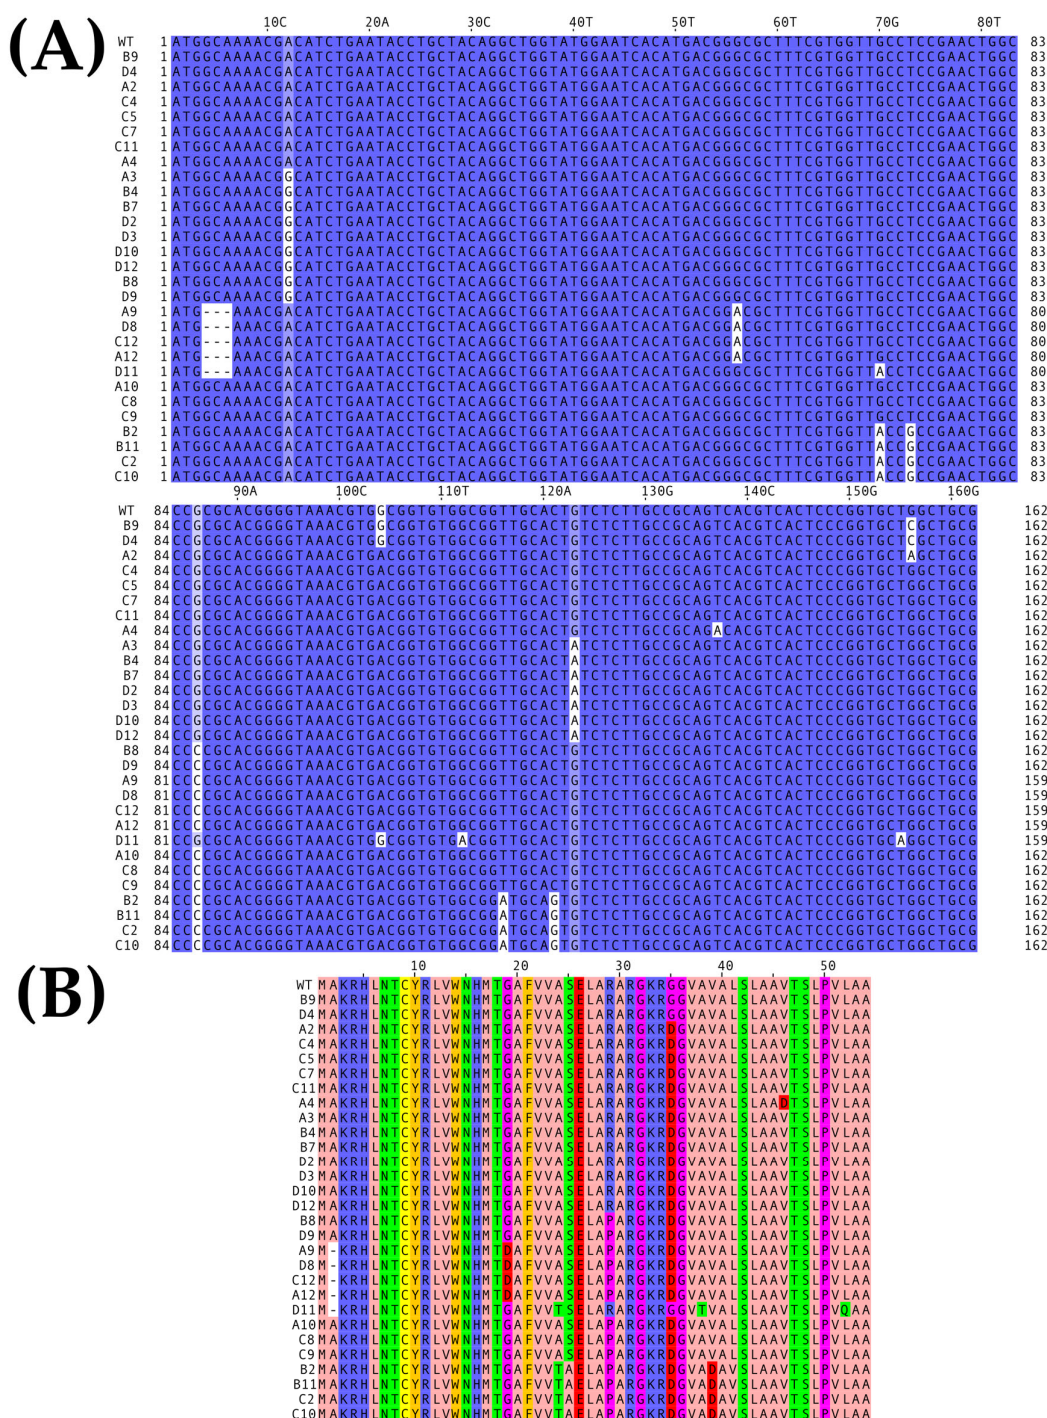

**Figure S4. Multiple sequence alignment of the nucleotide and amino acid Ag43 signal peptide sequences of 26 clones.** 7 different mutants were identified: B9, D4 (156G>C, silent); A2(104G>A, G35D; 156G>A, silent) ; C4, C5, C7, C11(70G>A, A24T; 74T>G, S25A; 86G>C, R29P; 104G>A, G35D; 116T>A, V39D; 121C>G, L41V); A4(104G>A, G35D; 137T>A, V46D); A3, B4, B7, D2, D3, D10, D12 (12A>G, silent; 104G>A, G35D); B8, D9 (12A>G, silent;86G>C, R29P ;104G>A, G35D); A9, D8, C12, A12 (4\_7del; 58G>A,G19D; 86G>C, R29P; 104G>A, G35D); D11 (4\_7del; 58G>A,G19D;70G>A,A24T; 112G>A; A38T; 115T>A, L52Q); A10, C8, C9 (86G>C, R29P; 104G>A, G35D); B2, B11, C2, C10 (70 G>A, A24T;73T>G S25A; 86G>C, R29P; 104G>A, G35D;116T>A, V39D).
